# Supplementary material for: The Genetic Legacy of the Pre-Colonial Period in Contemporary Bolivians
Source: PLoS One. 2013 Mar 20;8(3):e58980. doi: 10.1371/journal.pone.0058980 (PMC3604014; doi:10.1371/journal.pone.0058980)
Supplement: Table S2 — Shared haplotypes between Bolivia and other American locations. (XLSX) [file pone.0058980.s008.xlsx]

## Sheet: Table S3
Table S2. Shared haplotypes between Bolivia and other American locations.
PROFILES	Bolivia	AM-C	AM-N	AM-S	Genographic	Totals		Legend
092 111 1839 223 290 294 305 319 362	1	0	0	0	0	1
092 111 223 265 290 311 319 362	1	0	0	0	0	1		AM-C	Central America
092 111 223 290 319 357 362	1	0	0	0	1	2		AM-N	North America
092 111 223 290 319 362	3	5	4	14	13	39		AM-S	South America
092 1145 189 217	1	0	0	0	0	1
092 129 223 298 325 327	1	0	0	0	0	1
092 145 189 217	7	0	0	1	0	8
092 145 223 298 325	2	0	0	1	0	3
092 167 189 217 311	3	0	0	0	0	3
092 172 223 325 362	2	0	0	0	0	2
092 174 223 298 316 325 327	1	0	0	0	0	1
092 176 189 217 319 357	1	0	0	0	0	1
092 188 189 217	2	0	0	0	0	2
092 189 1941 195 217	1	0	0	0	0	1
092 189 217	1	1	9	6	11	28
092 189 217 258 263	1	0	0	0	0	1
092 189 217 293	1	0	0	0	0	1
092 189 217 311	2	0	0	0	2	4
092 189 217 362	1	0	0	1	0	2
092 189 223 325 335 362	1	0	0	0	0	1
092 223 235 301 342 362	1	0	0	0	0	1
092 223 298 325	1	0	0	0	0	1
092 223 301 342 362	1	0	0	0	0	1
093 129 148 168 172 187 1886 189 223 230 271 278 293 311 320	1	0	0	0	0	1
093 129 223 298 325 327	1	0	0	0	0	1
093 156 188 189 217 309	1	0	0	0	0	1
093 168 189 217	2	0	0	1	0	3
093 172 173 189 192 223 298 325 327 346	1	0	0	0	0	1
093 188 189 217	1	0	0	0	0	1
093 189 1941 195 217	1	0	0	0	0	1
093 189 217	14	2	5	7	3	31
093 189 217 2425	1	0	0	0	0	1
093 189 217 263 311	1	0	0	1	0	2
093 189 217 316	3	0	0	0	0	3
093 189 217 344	1	0	0	0	0	1
093 189 217 356	1	0	0	0	0	1
093 189 223 298 325 327	1	0	0	1	0	2
093 223 260 274 298 325 327	2	0	0	1	0	3
093 223 264 287 298 311 325 327	2	0	0	0	0	2
093 223 298 311 325 327	1	0	1	0	0	2
093 223 298 325 327	3	2	1	13	8	27
093 223 325 362	1	2	0	3	1	7
094 111 209 223 290 319	4	0	0	0	0	4
094 223 298 325 327	1	20	0	0	0	21
0955 189 1941 217 260	1	0	0	0	0	1
097 098 111 223 260 286 290 319 362	1	0	0	0	0	1
097 098 111 223 290 319 362	3	0	0	0	0	3
103 169 223 298 325 327 357	6	0	0	6	0	12
103 189 217 311 360	1	0	0	0	0	1
104 145 189 217	1	0	0	0	0	1
104 172 223 290 319 362	1	0	0	0	0	1
104 223	1	0	0	0	0	1
111 124 223 298 325 327	1	0	0	0	0	1
111 129 134 223 274 290 319 362	1	0	0	0	0	1
111 129 170 189 223 290 319 362	1	0	0	1	0	2
111 129 178 189 217	1	0	0	0	0	1
111 129 223 271 290 319 362	2	0	0	0	0	2
111 136 223 2685 290 319 362	1	0	0	1	0	2
111 136 223 290 319 362	2	6	0	0	1	9
111 138 209 223 290 301 319	1	0	0	0	0	1
111 140 189 223 264 290 319 362	4	0	0	4	0	8
111 147 223 270 290 319 362	3	0	0	0	0	3
111 148 223 290 319 362	1	0	1	0	1	3
111 156 223 298 325 327	1	0	0	0	0	1
111 170 189 223 290 319 362	1	0	0	0	0	1
111 176 223 290 319 362	1	0	0	0	0	1
111 183 223 298 325 327	1	0	0	1	0	2
111 186 223 266 290 319 362	1	0	0	0	0	1
111 187 223 290 304 319 362	1	0	0	0	0	1
111 188 189 223 290 319 362	1	0	0	0	0	1
111 189 217	5	2	110	1	38	156
111 189 217 223 290 319 3432 362	1	0	0	1	0	2
111 189 217 224	1	0	0	0	2	3
111 189 223 2395 266 290 319 362	1	0	0	0	0	1
111 189 223 2395 290 319 362	2	0	0	0	0	2
111 189 223 264 319	1	0	0	1	0	2
111 189 223 266 290 319 362	1	0	0	0	0	1
111 189 223 290 2932 319 362	1	0	0	0	0	1
111 189 223 290 319	2	0	0	2	0	4
111 189 223 290 319 360 362	1	0	0	0	0	1
111 189 223 290 319 362	3	19	4	73	14	113
111 189 266 290 319 362	3	0	0	0	0	3
111 209 223 290 301 319	2	0	0	0	0	2
111 209 223 290 319 362	1	3	11	52	17	84
111 217 223 290 319 3432 362	5	0	0	3	0	8
111 217 223 290 319 362	4	0	1	2	0	7
111 221 223 290 319 362	1	0	0	0	3	4
111 223 235 2665 290 319 362	1	0	0	0	0	1
111 223 266 290 319 362	5	6	1	16	1	29
111 223 274 278 290 319 362	1	0	0	0	0	1
111 223 274 290 319 362	1	8	9	3	12	33
111 223 290 293 319 362	1	0	0	1	0	2
111 223 290 294 319 335 362	1	0	0	0	0	1
111 223 290 294 319 362	2	0	0	3	0	5
111 223 290 311 319 362	4	5	4	6	10	29
111 223 290 319 357 362	1	1	0	0	5	7
111 223 290 319 362	38	245	272	351	164	1070
111 223 298 325 327	1	0	0	0	0	1
111 223 319	1	0	0	0	0	1
111 223 325 362	1	0	0	1	0	2
111 290 319 325 362	1	0	0	0	0	1
111 290 319 350 362	1	0	0	0	0	1
111 290 319 362	2	7	9	24	7	49
114 189 217	1	0	0	1	0	2
1146 129 222 223 325 362	1	0	0	1	0	2
124 142 189 223 311 325 362	1	0	0	0	0	1
124 223	1	26	14	12	24	77
124 223 319	1	1	6	5	10	23
126 187 189 223 270 278 293 311	1	1	2	1	1	6
126 189 223 298 325 327 344	2	0	0	2	0	4
126 223 298 325 327	2	1	5	8	5	21
129 147 223 257 298 325 327	2	0	0	0	0	2
129 148 168 172 187 1886 189 223 230 278 293 311 320	3	8	7	24	22	64
129 163 187 189 209 223 278 293 294 311 360	6	4	3	7	6	26
129 168 189 217	2	0	0	0	0	2
129 178 189 217	1	0	0	1	0	2
129 187 189 270 278 293 294 311 360	1	0	0	2	0	3
129 189 214 217	1	0	0	0	0	1
129 189 217	4	5	2	6	3	20
129 189 217 2345	1	0	0	1	0	2
129 189 217 299	1	0	0	0	0	1
129 207 223 298 325 327	1	0	0	0	0	1
129 222 223 325 362	1	0	0	0	0	1
129 223 286 298 325 327	4	0	0	0	0	4
129 223 298 311 325 327	1	0	0	0	0	1
129 223 298 319 325 327	1	0	0	0	0	1
129 223 298 325 327	2	1	2	9	1	15
131 223 298 325 327	1	0	0	0	1	2
140 188 189 217	3	0	0	2	0	5
140 189 217	1	0	0	10	4	15
140 189 217 355	1	0	0	0	0	1
140 223 298 311 325 327	2	0	0	1	0	3
140 223 298 325	1	0	0	0	0	1
140 223 298 325 327	1	0	0	1	0	2
142 148 223 278 325 356 362	1	1	0	1	0	3
142 173 223 325 362	1	0	0	0	0	1
142 223 325 362	1	0	0	0	1	2
145 156 157 189 217	1	0	0	0	0	1
145 168 223 256 298 311 325 327	1	0	0	0	0	1
145 168 223 256 298 325 327	2	0	0	0	0	2
145 189 217	3	0	2	0	0	5
145 189 217 320	2	0	0	0	0	2
145 189 217 362	1	0	0	0	0	1
145 192 223 298 325 327	1	0	0	5	0	6
145 223 270 298 325 327	1	0	0	1	0	2
146 189 217 218	1	0	0	0	0	1
147 223 257 298 325 327	1	0	0	0	0	1
147 223 298 325 327	1	0	0	4	1	6
1475 223 298 325 327	1	0	0	0	0	1
148 169 223 298 325 327 357	2	0	0	2	0	4
148 172 187 1886 189 223 230 311 320	2	10	9	14	13	48
148 189 217	1	0	2	1	2	6
148 223 298 311 325 327	1	0	0	1	0	2
154 223 298 325 327	2	0	0	2	0	4
157 209 223 298 325 327	2	0	0	0	1	3
161 173 189 217 324	3	0	0	3	0	6
162 223 298 299 325 327	3	0	0	2	0	5
165 189 217	1	0	0	0	0	1
166 185 189 1939 217 278	1	0	0	0	0	1
166 213 223 325 362	3	0	0	0	0	3
168 189 192 217	1	0	0	0	0	1
168 189 217	13	0	0	20	2	35
168 189 217 218	1	0	0	1	0	2
168 189 217 243 3015	1	0	0	0	0	1
168 189 217 270 278	1	0	0	2	0	3
168 189 217 287	1	0	0	0	0	1
168 189 217 295	2	0	0	1	0	3
168 189 217 3015	3	0	0	1	0	4
168 189 217 303	1	0	0	0	0	1
168 1939 217	1	0	0	0	1	2
169 1925 209 223 293 298 325 327	2	0	0	0	0	2
169 223 298 325 327 355 362	1	0	0	0	0	1
169 223 298 325 327 357	66	0	0	66	0	132
169 223 298 325 327 362	1	0	0	0	0	1
169 223 298 357	1	0	0	1	0	2
169 223 325 327 357	1	0	0	1	0	2
1699 189 217	1	0	0	0	0	1
1699 189 217 304 311	1	0	0	0	0	1
170 223 298 325 327	1	0	0	1	0	2
171 189 217	1	0	0	1	0	2
172 173 192 223 266 298 325 327 346	1	0	0	1	0	2
172 173 192 223 298 325 327 346	1	0	0	0	0	1
172 173 223 298 325 327 346	1	0	0	0	0	1
172 183 189 223 320	1	0	0	0	0	1
172 189 223 311 320	3	4	2	3	3	15
172 223 256 298 325 327	2	0	0	3	0	5
172 223 298 325 327	1	1	1	25	3	31
172 223 325 357 362	2	0	0	0	0	2
172 223 325 362	4	0	0	3	1	8
172 298 325 327	1	0	0	0	0	1
173 189 217	1	0	0	2	0	3
173 189 287	1	0	0	0	0	1
173 192 223 298 325 327 346	4	0	0	1	0	5
173 192 223 298 325 327 346 362	5	0	0	0	0	5
174 223 325 362	1	0	0	3	0	4
175 188 189 217	1	0	0	0	0	1
176 189 217 240 289 362	1	0	0	1	0	2
176 189 217 274 278 319 362	1	0	0	0	0	1
176 189 217 274 319 362	1	0	0	0	0	1
176 189 217 319	4	0	0	4	0	8
176 223 298 325 327	1	0	1	2	3	7
178 189 217	1	0	0	17	1	19
1802 223 2596 278 325 362	1	0	0	0	0	1
181 189 217	1	0	0	0	0	1
181 189 223 298 325 327 344	2	0	0	1	0	3
1839 186 189 217	1	0	0	1	1	3
184 215 223 298 325 327	1	0	0	0	0	1
1845 209 223 325 327	2	0	0	0	0	2
185 188 189 1939 217	1	0	0	0	0	1
185 189 1939 217	2	0	0	0	0	2
185 223 311 327	2	1	10	11	6	30
188 189 190 217	1	0	0	0	0	1
188 189 1939 217	2	0	0	0	0	2
188 189 214 217 245	1	0	0	0	0	1
188 189 217	111	1	0	41	2	155
188 189 217 260 266	1	0	0	0	0	1
188 189 217 2646	1	0	0	0	0	1
188 189 217 266	8	0	0	1	0	9
188 189 217 295 354	1	0	0	0	0	1
188 189 217 304	1	0	0	0	0	1
188 189 217 304 362	2	0	0	1	0	3
188 189 217 309	2	0	0	0	0	2
188 189 217 354	9	0	0	4	0	13
188 189 217 354 362	2	0	0	1	1	4
188 189 217 357	1	0	0	0	0	1
188 189 217 362	10	0	0	2	1	13
189	1	0	53	24	608	686
189 192 223 266 298 316 325 327	3	0	0	2	0	5
189 194 217	1	0	0	0	0	1
189 1941 217	1	0	0	0	0	1
189 196 217 292	1	0	0	0	0	1
189 203 217 218	1	0	0	0	0	1
189 203 217 359	2	0	0	0	0	2
189 212 217 261 266 319	1	0	0	0	0	1
189 212 217 261 319	2	0	0	0	0	2
189 213 217 362	2	0	0	0	0	2
189 214 217	2	0	0	1	0	3
189 216 217	1	0	0	0	0	1
189 217	125	135	80	360	123	823
189 217 218	4	0	0	1	0	5
189 217 218 233 356	2	0	0	0	0	2
189 217 218 354	1	0	0	0	0	1
189 217 220	2	0	0	1	0	3
189 217 220 287	2	0	0	0	0	2
189 217 233 356	1	0	0	1	0	2
189 217 2411	1	0	0	0	0	1
189 217 256 352	2	0	0	1	0	3
189 217 258 343	2	0	0	0	0	2
189 217 258 357	2	0	0	1	0	3
189 217 261	4	9	3	3	21	40
189 217 261 266 319	1	0	0	0	0	1
189 217 261 311	1	0	0	0	0	1
189 217 261 319	2	0	0	2	1	5
189 217 261 319 362	1	1	0	0	0	2
189 217 266	1	0	0	1	1	3
189 217 2691	1	0	0	0	0	1
189 217 270	2	0	0	0	0	2
189 217 270 278	2	0	0	2	0	4
189 217 274	1	0	8	6	2	17
189 217 274 289	1	0	0	0	0	1
189 217 274 319 362	1	0	0	1	0	2
189 217 278	1	11	4	0	7	23
189 217 286	2	1	0	0	1	4
189 217 286 289	1	0	0	1	0	2
189 217 289	10	1	0	3	0	14
189 217 290	6	0	0	0	1	7
189 217 292	7	0	0	1	0	8
189 217 292 311	1	0	0	0	0	1
189 217 293	1	0	0	1	0	2
189 217 293 311	1	0	0	1	0	2
189 217 2931	2	0	0	1	0	3
189 217 294	2	0	0	4	0	6
189 217 2945	1	0	0	0	0	1
189 217 295	1	20	5	0	6	32
189 217 295 325	1	0	0	0	0	1
189 217 296 362	2	0	0	0	0	2
189 217 298 311 356	1	0	0	0	0	1
189 217 3015	2	0	0	1	0	3
189 217 303	3	0	0	0	0	3
189 217 304	1	0	2	1	1	5
189 217 304 311	1	0	0	0	1	2
189 217 304 362	2	0	0	0	0	2
189 217 309	1	3	2	2	1	9
189 217 311	4	10	2	10	11	37
189 217 316	3	1	0	7	2	13
189 217 319	2	8	4	2	9	25
189 217 319 360	1	0	0	1	0	2
189 217 325	2	28	0	0	0	30
189 217 328	1	0	0	0	0	1
189 217 355	1	1	2	0	0	4
189 217 355 359	1	0	0	0	0	1
189 217 356 362	4	0	0	1	0	5
189 217 359	5	0	0	2	0	7
189 217 360	8	2	2	4	1	17
189 217 362	6	4	0	6	7	23
189 220 223 298 325 327	1	0	0	0	0	1
189 223	1	1	1	1	3	7
189 223 2346 256 290 319 362	1	0	0	0	0	1
189 223 298 309 325 327	1	0	0	0	0	1
189 223 298 319 325 327	1	0	0	1	0	2
189 223 298 325 327	2	5	8	13	5	33
189 223 298 325 327 344	3	0	0	3	0	6
189 223 310 325 362	1	0	0	1	0	2
189 223 325 327	1	0	0	4	1	6
189 223 325 327 344 357	1	0	0	0	0	1
189 223 325 362	2	8	3	16	1	30
189 256 352	1	0	0	1	1	3
189 317	2	0	0	1	0	3
189 357	1	0	0	0	1	2
192 223 266 298 325 327	4	0	0	1	0	5
192 223 287 298 325 327	1	0	0	1	0	2
192 223 298 325 327	6	0	0	3	0	9
192 223 298 325 327 354	2	0	0	2	0	4
192 223 298 325 327 356	7	0	0	2	0	9
192 223 325 327	1	0	0	0	0	1
192 223 325 362	1	4	2	2	1	10
209 218 223 256 311	1	0	0	0	0	1
209 223 290 301 319	1	0	0	0	0	1
209 223 290 319 362	1	0	4	0	0	5
209 223 298 325 327	1	0	0	3	1	5
209 223 311	2	6	6	12	11	37
209 223 325 362	1	0	3	2	0	6
213 223 247 298 325 327	1	0	0	1	0	2
217	1	0	7	8	4	20
220 223 325 362	1	0	0	0	0	1
223 231 258 259 325 362	1	0	0	0	0	1
223 2346 256 290 319 362	1	0	0	0	1	2
223 239 298 325 327	1	0	0	5	0	6
223 2396 298 325 327	2	0	0	0	0	2
223 241 260 294 301 342 362	2	0	0	3	0	5
223 241 271 292 294 301 342 362	2	0	0	2	0	4
223 241 291 294 301 342 362	2	0	0	0	0	2
223 241 294 301 342 362	1	0	0	1	0	2
223 241 2945 301 342 362	1	0	0	0	0	1
223 241 301 311 342 362	1	0	0	0	0	1
223 241 301 342 362	1	1	2	6	0	10
223 241 304 325 362	1	0	0	1	0	2
223 242 298 325 327	1	0	0	1	1	3
223 255 301 342 362	1	0	0	1	0	2
223 257 298 325 327	1	0	0	1	0	2
223 257 325 362	1	0	0	0	0	1
223 258 259 302 325 362	1	0	0	0	0	1
223 260 261 298 311 325 327	1	0	0	0	0	1
223 261 311 325 362	1	0	0	0	0	1
223 2652 316	1	1	0	2	0	4
223 266 298 325 327	1	0	0	3	3	7
223 270 287 298 325	1	0	0	1	0	2
223 274 298 310 325 327	1	0	0	0	0	1
223 274 298 325 327	2	1	7	3	8	21
223 278 291 362	4	1	0	6	0	11
223 278 294	1	4	12	9	7	33
223 288 325 354 362	1	0	0	0	0	1
223 290 293 319 362	1	0	0	0	0	1
223 290 319 357 362	1	0	1	0	1	3
223 290 319 362	5	25	30	39	38	137
223 291 298 325 327	1	0	0	4	0	5
223 291 362	14	0	1	18	12	45
223 292 298 325 327	1	0	0	3	0	4
223 292 325 362	1	1	0	2	0	4
223 293 325 362	6	0	0	2	0	8
223 294 298 325 327	1	1	8	1	2	13
223 295 298 325 327	1	68	9	1	12	91
223 298 301 325 327	3	1	0	1	0	5
223 298 311 325 327	7	10	8	19	7	51
223 298 325	2	0	0	3	1	6
223 298 325 327	66	77	234	362	143	882
223 298 325 327 335	1	4	1	7	1	14
223 298 325 327 3452	1	0	0	1	0	2
223 298 325 327 357	3	1	0	2	0	6
223 298 325 327 362	1	1	4	26	6	38
223 298 326 327	1	0	0	1	0	2
223 298 327	3	3	20	4	17	47
223 2988 325 327	1	0	0	0	0	1
223 320 325 362	2	0	0	1	0	3
223 325 327	1	3	4	30	2	40
223 325 362	26	27	64	98	35	250
224 311	1	0	91	30	1295	1417
226 298 325 327	1	0	0	0	0	1
287 311	1	0	0	1	2	4
290	1	0	2	2	16	21
298	1	0	48	21	724	794
298 3182	1	0	0	0	0	1
325 362	1	0	0	1	2	4
TOTALS	1127	2792	7551	5727	50033	9090
