# Supplementary material for: The Genetic Legacy of the Pre-Colonial Period in Contemporary Bolivians
Source: PLoS One. 2013 Mar 20;8(3):e58980. doi: 10.1371/journal.pone.0058980 (PMC3604014; doi:10.1371/journal.pone.0058980)
Supplement: Table S4 — Continental ancestry values (standard deviations in brackets) obtained using STRUCTURE for the Bolivian samples averaged through five different iterations (see Material and Methods for more information). The minimum and the maximum values are also given. (XLSX) [file pone.0058980.s010.xlsx]

## Sheet: Table S4
Table S4. Continental ancestry values (standard deviations in brackets) obtained using STRUCTURE for the Bolivian samples averaged through five different iterations (see Material and Methods for more information). The minimum and the maximum values are also given.
	CONTINENTAL ANCESTRY
	AVERAGE AND STANDARD DEVIATION				MAXIMUN VALUE				MINIMUM VALUE
	Africa	Europe	East Asia	America	Africa	Europe	East Asia	America	Africa	Europe	East Asia	America
Beni	0.012 (0.015)	0.261 (0.102)	0.046 (0.018)	0.682 (0.106)	0.071	0.4944	0.126	0.8722	0.0034	0.1034	0.0176	0.4566
Cochabamba	0.01 (0.009)	0.289 (0.084)	0.068 (0.022)	0.633 (0.089)	0.0412	0.506	0.1262	0.8046	0.0034	0.15	0.0366	0.3988
La Paz	0.003 (0.016)	0.185 (0.082)	0.019 (0.011)	0.793 (0.085)	0.2298	0.541	0.086	0.9102	0.0006	0.0766	0.0074	0.4478
Pando	0.025 (0.033)	0.258 (0.13)	0.057 (0.043)	0.661 (0.152)	0.166	0.8852	0.0704	0.8784	0.0048	0.0652	0.0208	0.264
Santa Cruz	0.007 (0.008)	0.39 (0.126)	0.029 (0.014)	0.574 (0.123)	0.048	0.6676	0.0992	0.82	0.0018	0.1612	0.0128	0.309
Chuquisaca	0.002 (0.002)	0.278 (0.079)	0.026 (0.008)	0.694 (0.079)	0.014	0.5044	0.0536	0.8642	0.001	0.1084	0.014	0.4744
Andean	0.003 (0.016)	0.187 (0.083)	0.014 (0.008)	0.797 (0.086)	0.23	0.5386	0.0642	0.9142	0.0008	0.0764	0.0056	0.453
Sub-Andean	0.004 (0.005)	0.264 (0.089)	0.036 (0.012)	0.696 (0.09)	0.0352	0.5244	0.0854	0.8764	0.0012	0.0876	0.0182	0.434
Llanos	0.016 (0.022)	0.3 (0.13)	0.042 (0.027)	0.642 (0.137)	0.1508	0.6902	0.2224	0.888	0.0032	0.0812	0.0134	0.2736
Rural	0.004 (0.008)	0.216 (0.112)	0.04 (0.019)	0.739 (0.114)	0.059	0.6126	0.0928	0.9012	0.001	0.0742	0.0156	0.3606
Urban	0.008 (0.019)	0.264 (0.119)	0.039 (0.025)	0.689 (0.124)	0.2548	0.6782	0.212	0.9016	0.0014	0.0634	0.0118	0.2944
Bolivia	0.007 (0.018)	0.246 (0.121)	0.036 (0.024)	0.711 (0.126)	0.2622	0.6792	0.2102	0.9134	0.0012	0.0562	0.0108	0.2962
